# Supplementary material
Source: PubMed Central journal article supplement (PMC5388811)
Supplement: JB.00846-16_zjb999094371s2.pdf [file JB.00846-16_zjb999094371s2.pdf]

## Supplemental materials for

Structural analysis of *Mycobacterium tuberculosis* homologues of the eukaryotic proteasome assembly chaperone 2 (PAC2)

Lin Bai, Jordan B. Jastrab, Marta Isasa, Kuan Hu, Hongjun Yu, Steven P. Gygi, K. Heran Darwin, and Huilin Li

The supplemental materials contain two supplementary figures and one supplementary dataset.

**Supplementary figure 1.** Density map of residues and water molecules in a selected region contoured at  $1.2\sigma$ .

**Supplementary figure 2.** ITC assay indicates no interaction between Rv2125 and WT 20S proteasome.

**Supplementary Dataset 1.** Full list of Tandem mass tag (TMT) labeling and mass spectrometry analysis results of wild-type v. Rv2125 mutant *M. tuberculosis*.

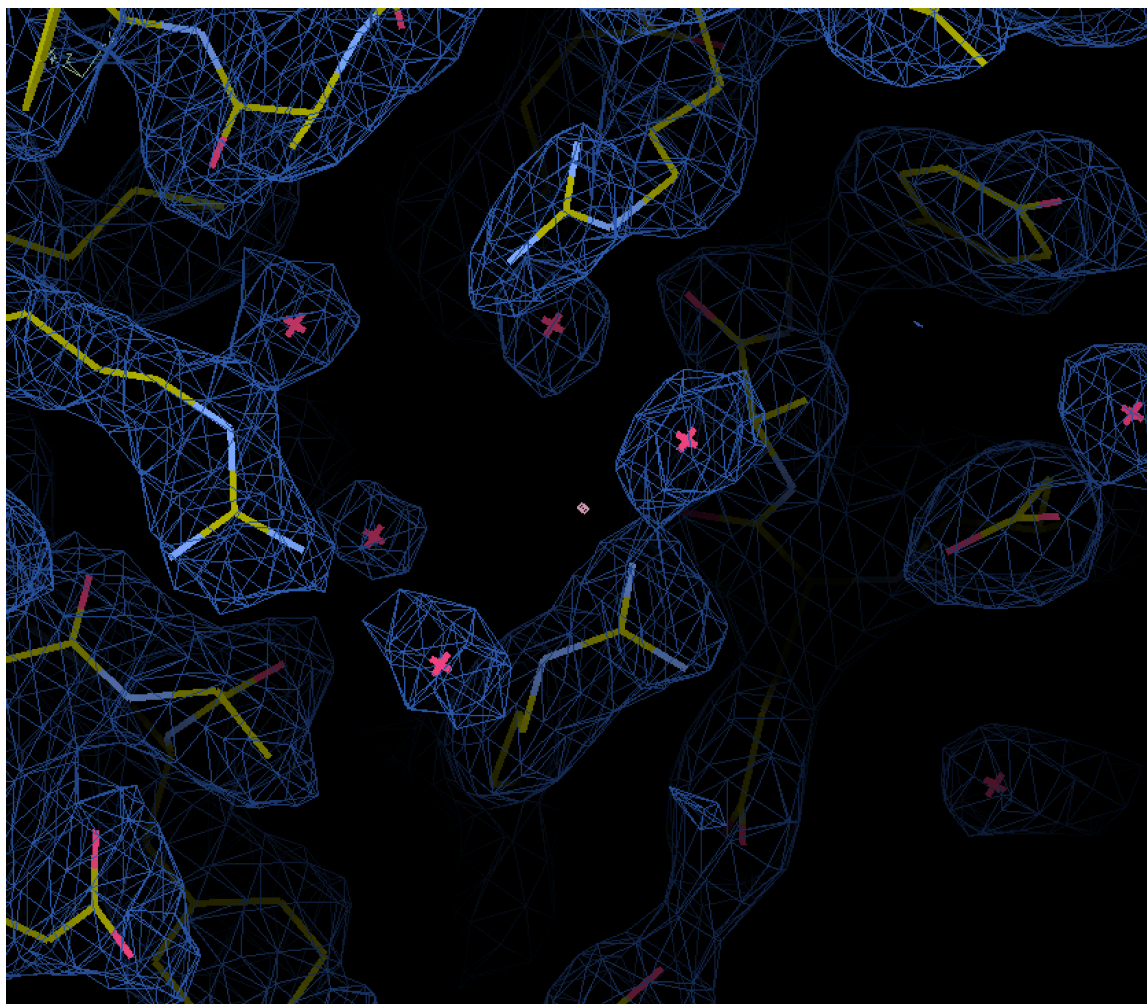

**Supplementary figure 1. Density map of residues and water molecules in a selected region contoured at  $1.2\sigma$ .**

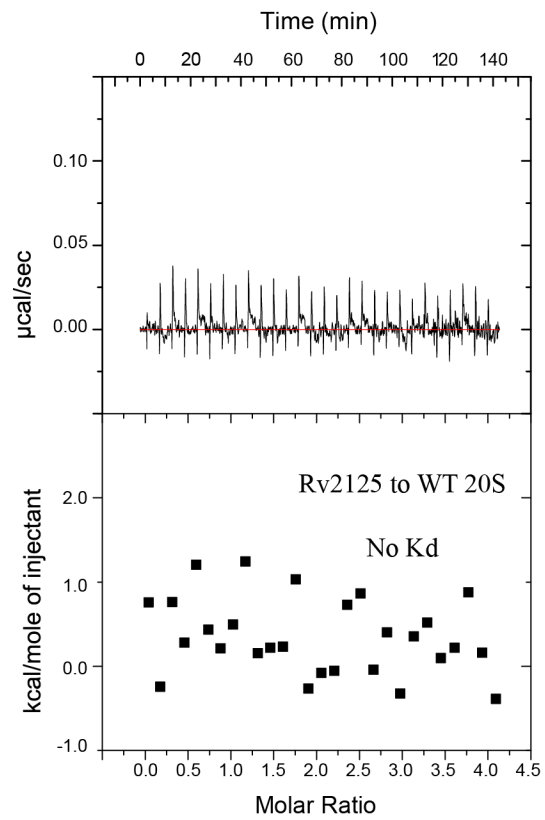

**Supplementary figure 2. ITC assay indicates no interaction between Rv2125 and WT 20S proteasome.**
